# Supplementary material for: Kinetics and Oligomer Products of the Multiphase Reactions of Hydroxyacetone with Atmospheric Amines, Ammonium Sulfate, and Cloud Processing
Source: PubMed Central journal article supplement — ACS Earth Space Chem. 2024 Dec 6;8(12):2574–86. doi: 10.1021/acsearthspacechem.4c00237 (PMC11664653; doi:10.1021/acsearthspacechem.4c00237), 2024-12-06
Supplement: sp4c00237_si_001.pdf [file sp4c00237_si_001.pdf]

Kinetics and oligomer products of the multi-phase  
reactions of hydroxyacetone with atmospheric amines,  
ammonium sulfate, and cloud processing:

Supplemental Information

*David O. De Haan,<sup>1\*</sup> Lelia Nahid Hawkins,<sup>2</sup> Elyse A. Pennington,<sup>2</sup> Hannah G. Welsh,<sup>2</sup> Alyssa A. Rodriguez,<sup>1</sup> Michael A. Symons,<sup>1</sup> Alyssa D. Andretta,<sup>1</sup> Michael A. Rafla,<sup>1</sup> Chen Le,<sup>1</sup> Audrey C. De Haan,<sup>1</sup> Tianqu Cui,<sup>3†</sup> Jason D. Surratt,<sup>3,4</sup> Mathieu Cazaunau,<sup>5</sup> Edouard Pangui,<sup>5</sup> Jean-François Doussin<sup>5</sup>*

1: Department of Chemistry and Biochemistry, University of San Diego, 5998 Alcalá Park, San Diego CA 92117 USA

2: Hixon Center for Climate and the Environment, Harvey Mudd College, 301 Platt Blvd, Claremont CA 91711 USA

3: Department of Environmental Sciences and Engineering, Gillings School of Global Public Health, University of North Carolina at Chapel Hill, Chapel Hill NC 27599 USA

4: Department of Chemistry, College of Arts and Sciences, University of North Carolina at Chapel Hill, Chapel Hill NC 27599 USA

5: Université Paris-Est Créteil and Université Paris Cité, CNRS, LISA, F-94010 Créteil, France

†current address : PSI Center for Energy and Environmental Sciences, Paul Scherrer Institute (PSI), 5232 Villigen-PSI, Switzerland

\* Corresponding author contact: 011-1-619-260-6882, -011-1-619-260-2211 fax, [ddehaan@sandiego.edu](mailto:ddehaan@sandiego.edu)

Figures S1-S4, Table S1, 7 pages total

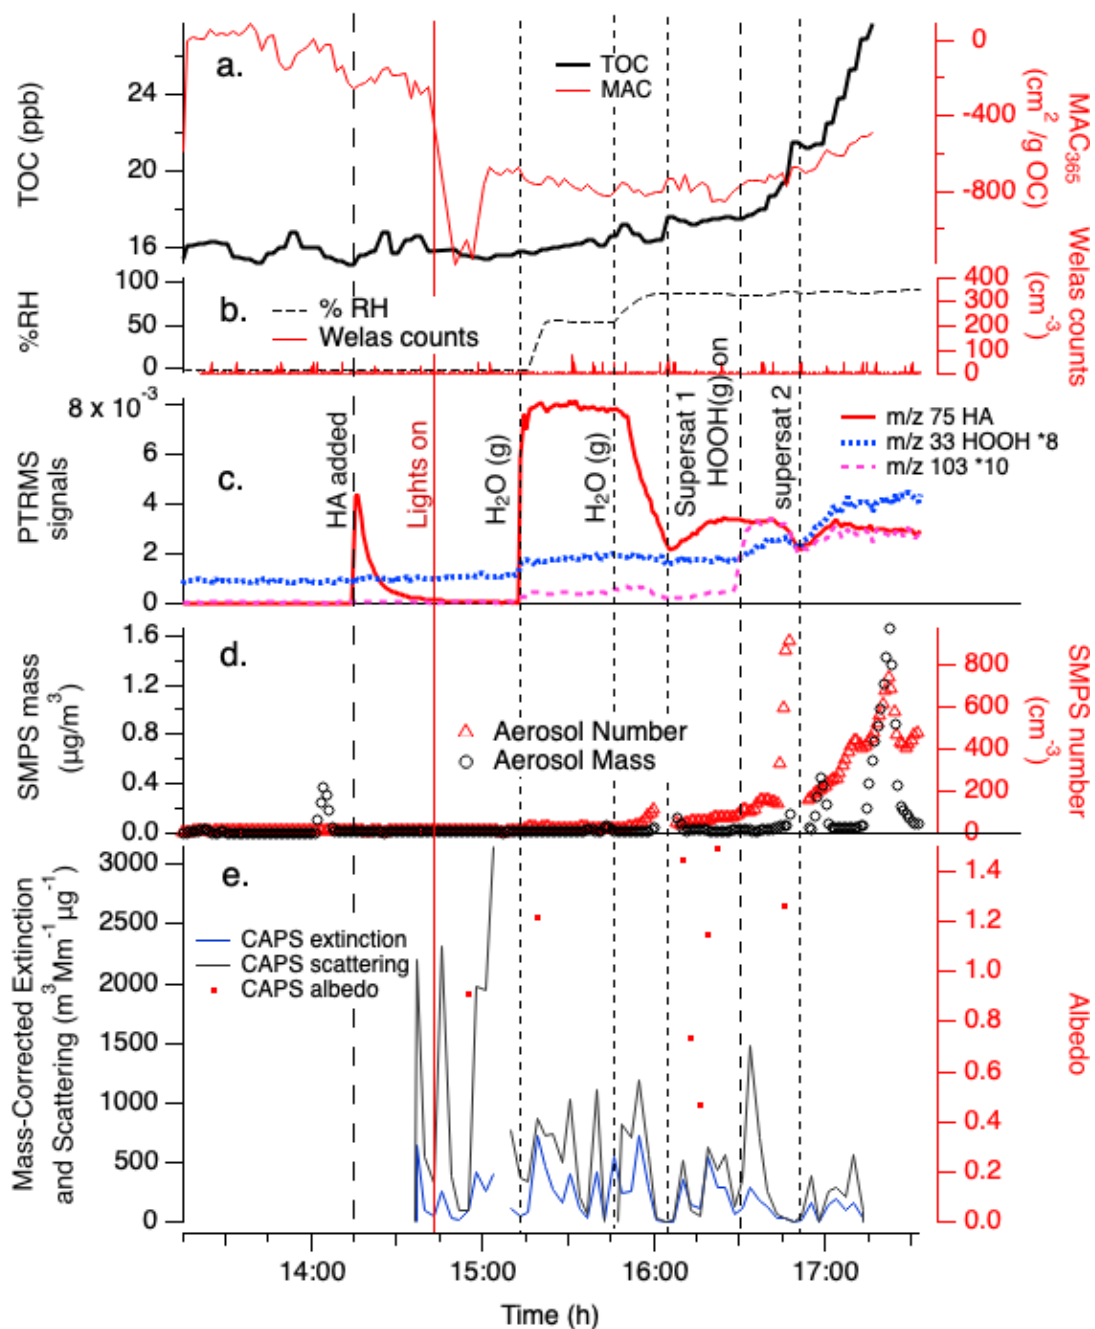

**Figure S1.** Expt. A with gas-phase hydroxyacetone, photolysis, cloud processing, and HOOH oxidation without seed particles in the CESAM chamber. HA addition, start of chamber illumination and HOOH(g) addition, two water vapor additions, and two water supersaturation events are labeled. Panel **a**: total organic carbon readings and mass absorption coefficients at 365 nm from PILS/waveguide UV-vis, color coded to axes. **b**: chamber RH and droplet spectrometer counts, color coded to axes. **c**: water-corrected PTR-MS data ( $m/z$  75 HA, red line,  $m/z$  33 HOOH fragment  $\times 8$ , blue dotted line,  $m/z$  103  $\times 10$ , pink dash). **d**: dilution- and wall-loss-corrected SMPS total mass (assuming density = 1 g/cm<sup>3</sup>) and counts, color-coded to axes. **e**: CAPS-ssa data at 450 nm (mass-corrected extinction, blue line; mass-corrected scattering black line; single-scattering albedo, red dots).

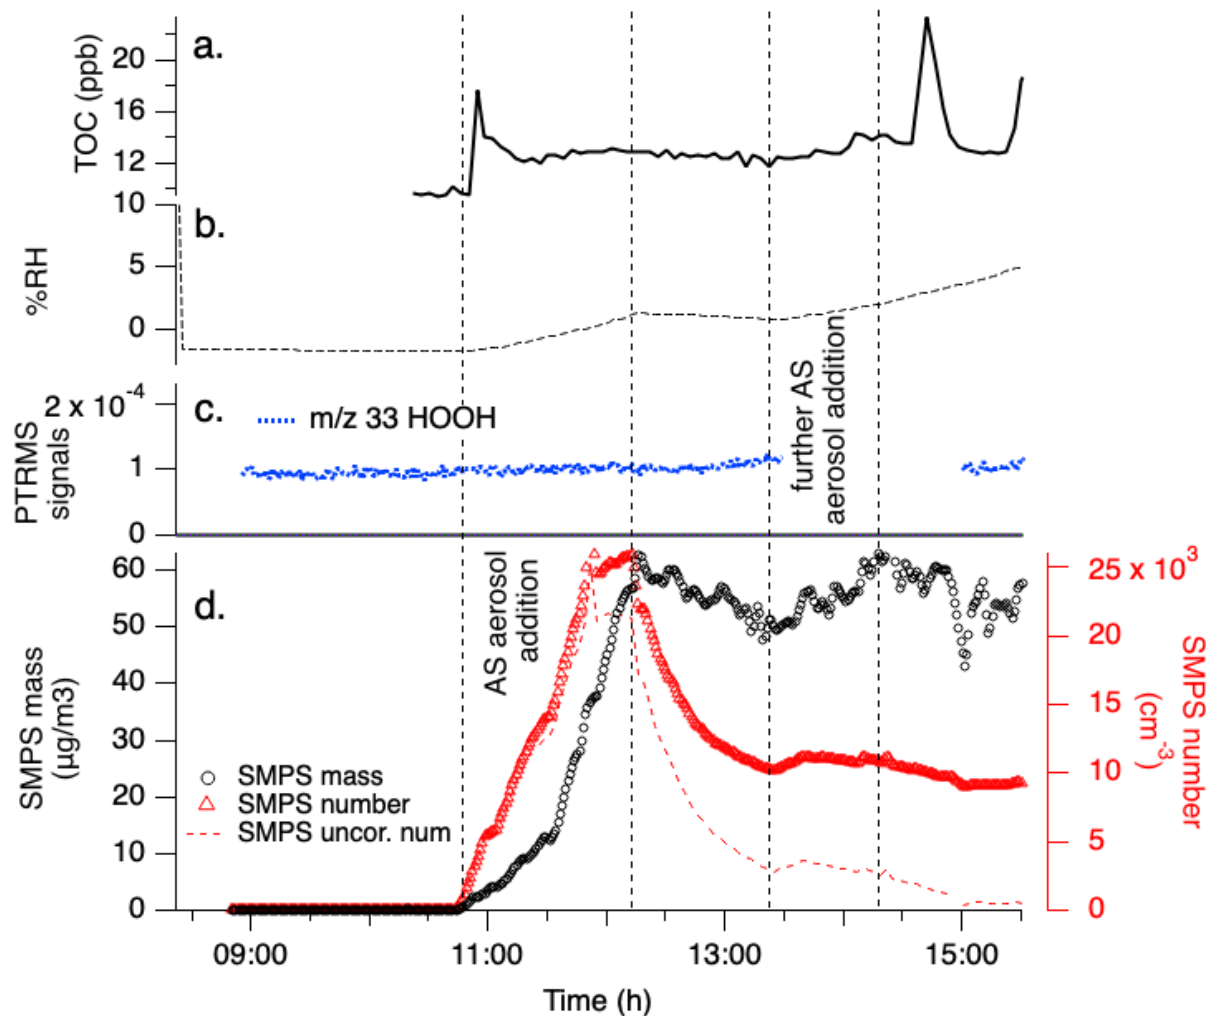

**Figure S2.** Experiment E (control) with AS seed particles in the CESAM chamber. Two AS addition periods are labeled. Panel **a**: total organic carbon readings in ppb from PILS sampling (black). No waveguide absorbance data was collected. **b**: chamber RH (black dashed line). **c**: water-corrected PTR-MS data for  $m/z$  33 HOOH frag (blue dotted line). **d**: dilution- and wall-loss-corrected SMPS total mass (assuming density =  $1 \text{ g}/\text{cm}^3$ ) and counts, color-coded to axes. Uncorrected SMPS counts also shown (red dashed line). No CAPS-ssa data was collected.

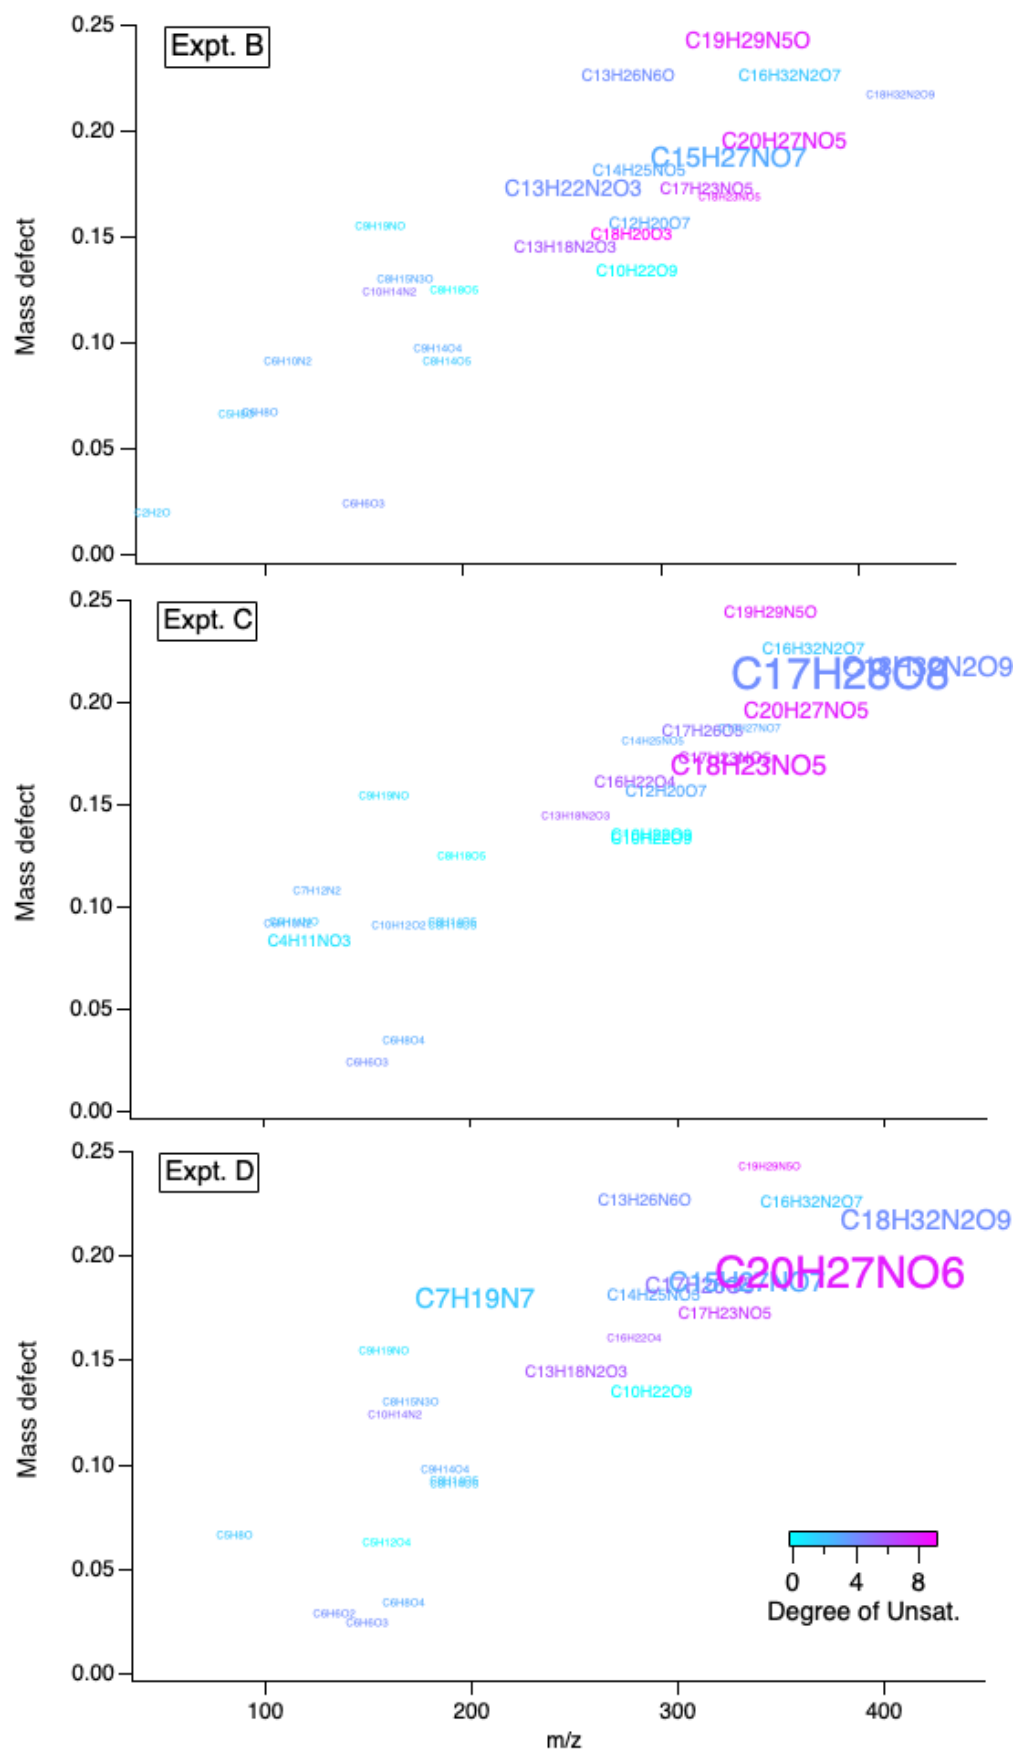

**Figure S3.** Kendrick mass defect plot showing differences from unit mass of each UHPLC-(+)ESI-HRMS peak with an assigned chemical formula in aerosol collected at the end of Expts. B-D. Colors and symbols indicate degree of unsaturation, and font size is proportional to peak area.

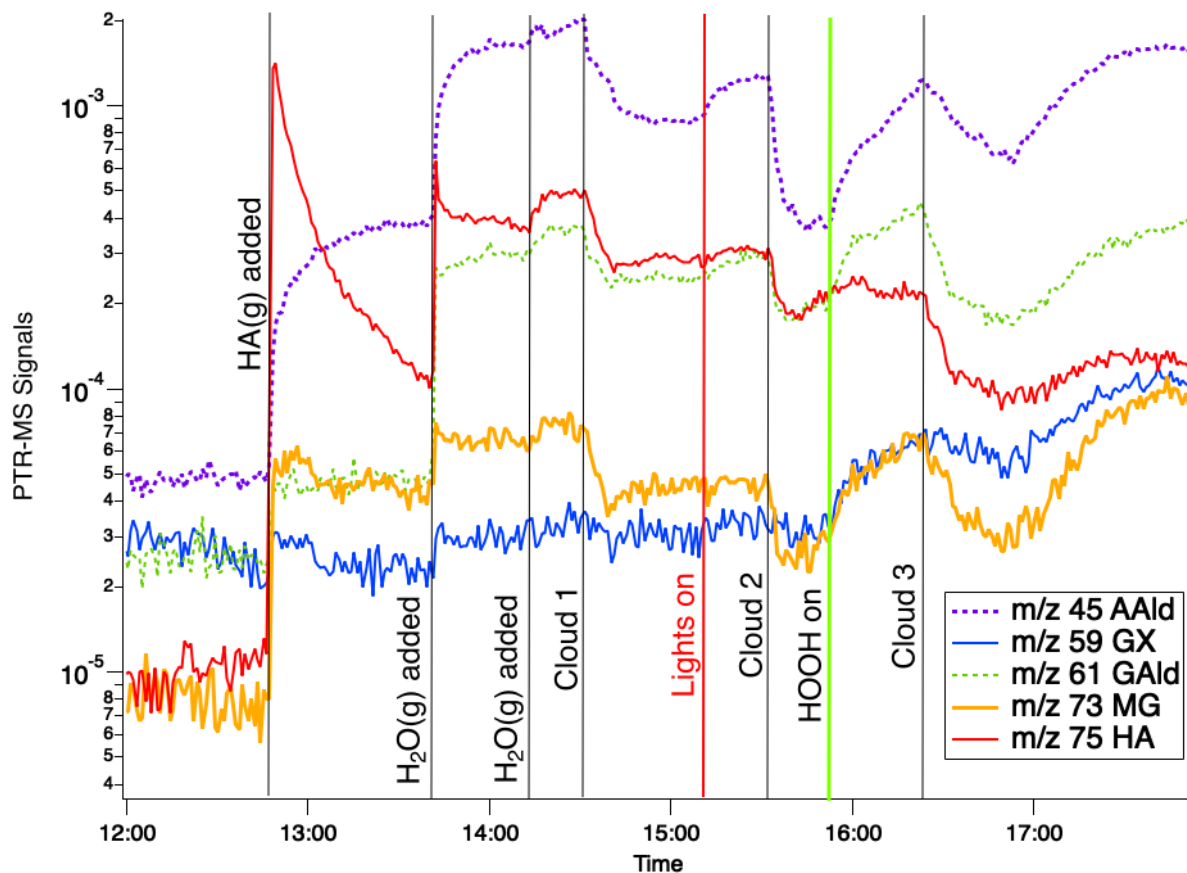

**Figure S4:** PTR-MS traces for  $m/z$  75 hydroxyacetone (red trace) and various aldehyde species in Experiment B, showing responses to turning chamber lights on (red vertical line) and adding HOOH as an OH radical source (green vertical line). PTR-MS signals at  $m/z$  45, acetaldehyde (purple dashes);  $m/z$  59, glyoxal (blue);  $m/z$  61, glycolaldehyde (green dashes); and  $m/z$  73, methylglyoxal with some contribution from HA fragments (orange). Experimental events in chamber are noted with labelled vertical lines.

**Table S1:** Major Organic Species Detected in Aerosol Phase at End of Chamber Experiments

| <i>m/z</i> | RT<br>(min) | Peak<br>area<br>Expt B<br>HA <sub>g</sub> +<br>AS | Peak<br>area<br>Expt C<br>HA <sub>g</sub> +<br>AS/Gly | Peak<br>area<br>Expt D<br>MeAm <sub>g</sub> +<br>AS/HA | Formula<br>assigned | Ion                          | Unsat | Delta<br>(ppm) | Precursors                               |
|------------|-------------|---------------------------------------------------|-------------------------------------------------------|--------------------------------------------------------|---------------------|------------------------------|-------|----------------|------------------------------------------|
| 43.0190    | 8.28        | 9.1E+03                                           |                                                       |                                                        | C2H2O               | H+                           | 2     | 14.6           | unknown                                  |
| 85.0653    | 11.58       | 7.6E+03                                           |                                                       | 7.2E+03                                                | C5H8O               | H+                           | 2     | 0              | 2 HA - CO <sub>2</sub>                   |
| 97.0660    | 14.22       | 4.5E+04                                           |                                                       |                                                        | C6H8O               | H+                           | 3     | 7.1            | 3 AAld                                   |
| 111.0907   | 7.52        | 1.3E+04                                           | 1.4E+04                                               |                                                        | C6H10N2             | H+                           | 3     | -13.6          | 2 HA + 2 NH <sub>3</sub>                 |
| 114.0917   | 7.73        |                                                   | 1.2E+04                                               |                                                        | C6H11NO             | H+                           | 2     | -1.9           | HA + AAld + Glycine -<br>CO <sub>2</sub> |
| 122.0820   | 10.75       |                                                   | 1.1E+06                                               |                                                        | C4H11NO3            | H+                           | 1     | 2.5            | HA + Glycine - CO <sub>2</sub>           |
| 125.1074   | 8.96        |                                                   | 3.3E+04                                               |                                                        | C7H12N2             | H+                           | 3     | -3.7           | HA + 2AAld + 2 NH <sub>3</sub>           |
| 133.0278   | 1.06        |                                                   |                                                       | 8.0E+04                                                | C6H6O2              | Na+                          | 4     | 9.8            | MG +HA                                   |
| 149.0233   | 13.42       | 2.5E+04                                           | 4.4E+05                                               | 5.6E+05                                                | C6H6O3              | Na+                          | 4     | 12             | 2MG                                      |
| 158.1539   | 6.33        | 2.5E+05                                           | 2.5E+05                                               | 2.1E+04                                                | C9H19NO             | H+                           | 1     | -4             | unknown                                  |
| 159.0623   | 9.06        |                                                   |                                                       | 7.0E+04                                                | C5H12O4             | Na+                          | 0     | -6.3           | HA + AAld                                |
| 163.1232   | 9.92        | 3.4E+03                                           |                                                       | 3.7E+04                                                | C10H14N2            | H+                           | 5     | -1.7           | 2HA +2AAld +2 NH <sub>3</sub>            |
| 165.0906   | 11.60       |                                                   | 5.9E+05                                               |                                                        | C10H12O2            | H+                           | 3     | -5.9           | 2AAld +2HA                               |
| 167.0336   | 13.83       |                                                   | 4.1E+04                                               | 1.2E+04                                                | C6H8O4              | Na+                          | 3     | 9.6            | 2MG                                      |
| 170.1297   | 6.10        | 2.5E+04                                           |                                                       | 1.6E+05                                                | C8H15N3O            | H+                           | 3     | 2.2            | GAld +2HA + 3NH <sub>3</sub>             |
| 187.0967   | 9.72        | 1.2E+04                                           |                                                       | 1.2E+04                                                | C9H14O4             | H+                           | 3     | -1.5           | 3HA                                      |
| 191.0902   | 6.81        | 2.2E+04                                           | 4.7E+03                                               | 2.1E+04                                                | C8H14O5             | H+                           | 2     | -8.9           | GAld +2HA                                |
| 191.0917   | 6.43        |                                                   | 7.5E+04                                               | 9.6E+04                                                | C8H14O5             | H+                           | 2     | -1.4           | GAld +2HA                                |
| 195.1239   | 6.83        | 1.1E+05                                           | 3.6E+05                                               |                                                        | C8H18O5             | H+                           | 0     | 3.6            | MG +2HA -CO <sub>2</sub>                 |
| 202.1784   | 7.96        |                                                   |                                                       | 5.6E+06                                                | C7H19N7             | H+                           | 2     | 1.7            | 2GX +HA +7NH <sub>3</sub>                |
| 251.1436   | 11.17       | 1.1E+06                                           | 3.8E+04                                               | 1.2E+06                                                | C13H18N2O3          | H+                           | 6     | 16.1           | 2GAld +3HA +2NH <sub>3</sub>             |
| 255.1720   | 11.46       | 3.1E+06                                           |                                                       |                                                        | C13H22N2O3          | H+                           | 4     | 4.5            | 2AAld +3HA +2NH <sub>3</sub>             |
| 279.1601   | 12.91       |                                                   | 1.8E+06                                               | 4.9E+05                                                | C16H22O4            | H+                           | 6     | 1.6            | 5AAld +2HA                               |
| 283.2251   | 12.18       | 1.1E+06                                           |                                                       | 1.0E+06                                                | C13H26N6O           | H+                           | 4     | 1.8            | 2GAld +3HA +6NH <sub>3</sub>             |
| 285.1496   | 11.12       | 2.2E+06                                           |                                                       |                                                        | C18H20O3            | H+                           | 9     | 1.8            | GAld +8AAld                              |
| 287.1324   | 10.53       | 1.3E+06                                           | 1.4E+06                                               |                                                        | C10H22O9            | H+                           | 0     | -6.3           | 2GAld +2HA                               |
| 287.1337   | 11.57       |                                                   | 1.4E+06                                               | 1.3E+06                                                | C10H22O9*           | H+                           | 0     | -1.8           | 2GAld +2HA                               |
| 288.1800   | 11.04       | 2.3E+06                                           | 8.4E+04                                               | 2.3E+06                                                | C14H25N5O5          | H+                           | 3     | -3.7           | GAld +2AAld +2HA<br>+NH <sub>3</sub>     |
| 294.1551   | 8.01        | 1.1E+06                                           | 1.1E+06                                               |                                                        | C12H20O7            | NH <sub>4</sub> <sup>+</sup> | 3     | -0.6           | MG +3HA                                  |
| 311.1852   | 11.72       |                                                   | 1.7E+06                                               | 3.0E+06                                                | C17H26O5*           | H+                           | 5     | -2             | HA +7AAld                                |
| 322.1712   | 10.52       | 2.3E+06                                           | 2.3E+06                                               | 2.3E+06                                                | C17H23N5O5*         | H+                           | 7     | 17.7           | GAld +5HA +NH <sub>3</sub>               |
| 334.1677   | 10.15       | 7.9E+05                                           | 4.6E+06                                               |                                                        | C18H23N5O5          | H+                           | 8     | 6.6            | MG +5HA +NH <sub>3</sub>                 |
| 334.1866   | 10.30       | 4.5E+06                                           | 2.6E+05                                               | 4.4E+06                                                | C15H27N7O7*         | H+                           | 3     | 0.2            | 5HA +NH <sub>3</sub>                     |
| 344.2425   | 13.10       | 2.9E+06                                           | 2.3E+06                                               | 4.7E+05                                                | C19H29N5O           | H+                           | 8     | -7.3           | AAld +GAld +5HA<br>+5NH <sub>3</sub>     |
| 362.1952   | 11.45       | 4.1E+06                                           | 3.8E+06                                               |                                                        | C20H27N5O5          | H+                           | 8     | -4.4           | AAld +6HA +NH <sub>3</sub>               |
| 365.2250   | 9.30        | 2.2E+06                                           | 1.9E+06                                               | 2.2E+06                                                | C16H32N2O7          | H+                           | 2     | -10.4          | 2AAld +4HA +2NH <sub>3</sub>             |

|          |       |         |         |         |             |                   |   |      |                            |
|----------|-------|---------|---------|---------|-------------|-------------------|---|------|----------------------------|
| 378.1908 | 11.65 |         |         | 9.6E+06 | C20H27N06   | H+                | 8 | -2.4 | GAld +6HA +NH <sub>3</sub> |
| 378.2125 | 11.77 |         | 1.0E+07 |         | C17H28O8    | NH <sub>4</sub> + | 4 | -0.6 | AAld +5HA                  |
| 421.2161 | 12.21 | 6.2E+04 | 4.6E+06 | 4.3E+06 | C18H32N2O9* | H+                | 4 | -6   | 2MG +4HA +2NH <sub>3</sub> |

Notes:  $m/z$  = detected mass-to-charge ratio in positive ion ESI mode. RT = UPLC retention time. Ion = ionization. Unsat = degrees of unsaturation. Delta = difference between predicted and detected exact mass, in ppm. \* = recommended tracer ions for HA oligomerization chemistry.
